# Supplementary material for: RAFFI: Accurate and fast familial relationship inference in large scale biobank studies using RaPID
Source: PubMed Central journal article supplement (PMC7853505; doi:10.1371/journal.pgen.1009315), 2021-01-21
Supplement: pgen.1009315.s006.pdf [file pgen.1009315.s006.pdf]

**S1 Table:** Number of pairs for different degrees of relatedness in simulated data.

| <b>Relationship</b>                               | <b>Number of Pairs</b> |
|---------------------------------------------------|------------------------|
| <b>Parent/Offspring</b>                           | 6000                   |
| <b>Full sibling</b>                               | 4531                   |
| <b>2<sup>nd</sup> degree</b>                      | 24,926                 |
| <b>3<sup>rd</sup> degree</b>                      | 54,130                 |
| <b>4<sup>th</sup> degree</b>                      | 96,477                 |
| <b>Unrelated (5<sup>th</sup> degree and more)</b> | 7,811,936              |
| <b>Total</b>                                      | <b>7,998,000</b>       |
