# Supplementary material for: RAFFI: Accurate and fast familial relationship inference in large scale biobank studies using RaPID
Source: PubMed Central journal article supplement (PMC7853505; doi:10.1371/journal.pgen.1009315), 2021-01-21
Supplement: pgen.1009315.s007.pdf [file pgen.1009315.s007.pdf]

**S2 Table:** Comparison of results of RAFFI and KING using all participants in the UK Biobank data.

|              |                       | <b>KING</b> |           |           |                       |                       |                       |                  |
|--------------|-----------------------|-------------|-----------|-----------|-----------------------|-----------------------|-----------------------|------------------|
|              |                       | <b>MZ</b>   | <b>PO</b> | <b>FS</b> | <b>2<sup>nd</sup></b> | <b>3<sup>rd</sup></b> | <b>4<sup>th</sup></b> | <b>unrelated</b> |
| <b>RAFFI</b> | <b>MZ</b>             | 179         | 0         | 0         | 0                     | 0                     | 0                     | 0                |
|              | <b>PO</b>             | 0           | 6184      | 0         | 1                     | 0                     | 0                     | 0                |
|              | <b>FS</b>             | 0           | 2         | 22339     | 5                     | 9                     | 0                     |                  |
|              | <b>2<sup>nd</sup></b> | 0           | 62        | 299       | 10875                 | 32                    | 0                     | 16               |
|              | <b>3<sup>rd</sup></b> | 0           | 22        | 24        | 1585                  | 59363                 | 207                   | 168              |
|              | <b>4<sup>th</sup></b> | 0           | 4         | 1         | 65                    | 9780                  | 68212                 | 22519            |
|              | <b>unrelated</b>      | 0           | 3         | 0         | 19                    | 175                   | 17728                 |                  |
