# Supplementary material for: RAFFI: Accurate and fast familial relationship inference in large scale biobank studies using RaPID
Source: PubMed Central journal article supplement (PMC7853505; doi:10.1371/journal.pgen.1009315), 2021-01-21
Supplement: pgen.1009315.s008.pdf [file pgen.1009315.s008.pdf]

**S3 Table:** Comparison of results of RAFFI and KING using non-British people in the UK Biobank data.

|              |                  | <b>KING</b> |           |           |            |            |            |                  |
|--------------|------------------|-------------|-----------|-----------|------------|------------|------------|------------------|
|              |                  | <b>MZ</b>   | <b>PO</b> | <b>FS</b> | <b>2nd</b> | <b>3rd</b> | <b>4th</b> | <b>unrelated</b> |
| <b>RAFFI</b> | <b>MZ</b>        | 12          | 0         | 1         | 0          | 0          | 0          | 0                |
|              | <b>PO</b>        | 0           | 202       | 0         | 6          | 0          | 0          | 0                |
|              | <b>FS</b>        | 0           | 0         | 1039      | 0          | 0          | 0          | 0                |
|              | <b>2nd</b>       | 0           | 42        | 192       | 437        | 30         | 0          | 3                |
|              | <b>3rd</b>       | 0           | 10        | 1         | 119        | 1331       | 30         | 96               |
|              | <b>4th</b>       | 0           | 2         | 0         | 51         | 329        | 789        | 1478             |
|              | <b>unrelated</b> | 0           | 0         | 0         | 5          | 101        | 895        | 0                |
