# Supplementary material for: RAFFI: Accurate and fast familial relationship inference in large scale biobank studies using RaPID
Source: PubMed Central journal article supplement (PMC7853505; doi:10.1371/journal.pgen.1009315), 2021-01-21
Supplement: pgen.1009315.s009.pdf [file pgen.1009315.s009.pdf]

**S4 Table:** Run time and peak memory comparison of RAFFI and KING.

| <b>Core</b> | <b>#samples</b> | <b>Tool</b> | <b>Wall time</b> | <b>Peak Memory</b> |        |
|-------------|-----------------|-------------|------------------|--------------------|--------|
| <b>1</b>    | 4000            | RAFFI       | 00:27:14         | 248 MB             |        |
|             |                 | KING        | 00:06:58         | 924 MB             |        |
|             | 487409          | RAFFI       | ~5 days          | ~4 GB              |        |
|             |                 | KING        | ~90 days         | ~74 GB             |        |
|             | <b>24</b>       | 4000        | RAFFI            | 00:02:51           | 694 MB |
|             |                 |             | KING             | 00:00:43           | 942 MB |
| 487409      |                 | RAFFI       | ~15 h            | ~4 GB              |        |
|             |                 | KING        | ~4 Days          | ~74 GB             |        |
