# Supplementary material for: RAFFI: Accurate and fast familial relationship inference in large scale biobank studies using RaPID
Source: PubMed Central journal article supplement (PMC7853505; doi:10.1371/journal.pgen.1009315), 2021-01-21
Supplement: pgen.1009315.s010.pdf [file pgen.1009315.s010.pdf]

## S1 Appendix: Pseudocode for adjustment of kinship coefficients

The following pseudo-code illustrates the adjustment of kinship coefficients using detected full-sibling pairs iteratively. The objective of the iterations is to capture a sufficient amount of full-sibling pairs (1000 by default) which are then used to estimate the adjustment factor.  $\Phi^{ai}(j, k)$  represents the kinship coefficient between the individuals  $j$  and  $k$  at the  $i$ -iteration using the adjustment factor  $\alpha_i$ .  $\pi_2^{ai}(j, k)$  denotes the IBD2 segment proportion between the individuals  $j$  and  $k$  at the  $i$ -iteration.  $F(\alpha_i)$  is the number of full-sibling pairs at the  $i$ -th iteration.

```
i = 0, min_num_fs = 50, prev_adj_num_fs = 0, max_num_fs = 1000,  $\Phi_{min}^{ai} = 0.1$ 
```

```
For j, k in S: // S is the set of pairs sharing IBD segments between two pairs j and k
```

```
  Compute  $\Phi^{ai}(j, k)$ ,  $\pi_2^{ai}(j, k)$ 
```

```
  IF ( $\Phi^{ai} > \Phi_{min}^{ai}$  AND ( $|F(\alpha_i)| < min\_num\_fs$  OR  $|F(\alpha_i)| - prev\_adj\_num\_fs < min\_adj\_intervals$ )) :
```

```
    Infer relationship of j, k and store it temporarily
```

```
  Else if  $|F(\alpha_i)| \geq min\_num\_fs$  AND  $|F(\alpha_i)| - prev\_adj\_num\_fs > min\_adj\_intervals$ :
```

```
    prev_adj_num_fs =  $|F(\alpha_i)|$ 
```

```
    compute  $\alpha_{i+1}$ 
```

```
    i = i + 1
```

```
    Update the relatedness (boundaries) using  $\alpha_i$ 
```

```
  IF  $|F(\alpha_i)| > max\_num\_fs$ :
```

```
    Return  $\alpha_i$ 
```

Pseudo-code for adjustment of kinship coefficients iteratively.
